# Supplementary material for: Localization of beta power decrease as measure for lateralization in pre-surgical language mapping with magnetoencephalography, compared with functional magnetic resonance imaging and validated by Wada test
Source: Front Hum Neurosci. 2022 Oct 26;16:996989. doi: 10.3389/fnhum.2022.996989 (PMC9644652; doi:10.3389/fnhum.2022.996989)
Supplement: Supplementary file 1 [file Data_Sheet_1.docx]

Supplementary Material

# Supplementary Figures:


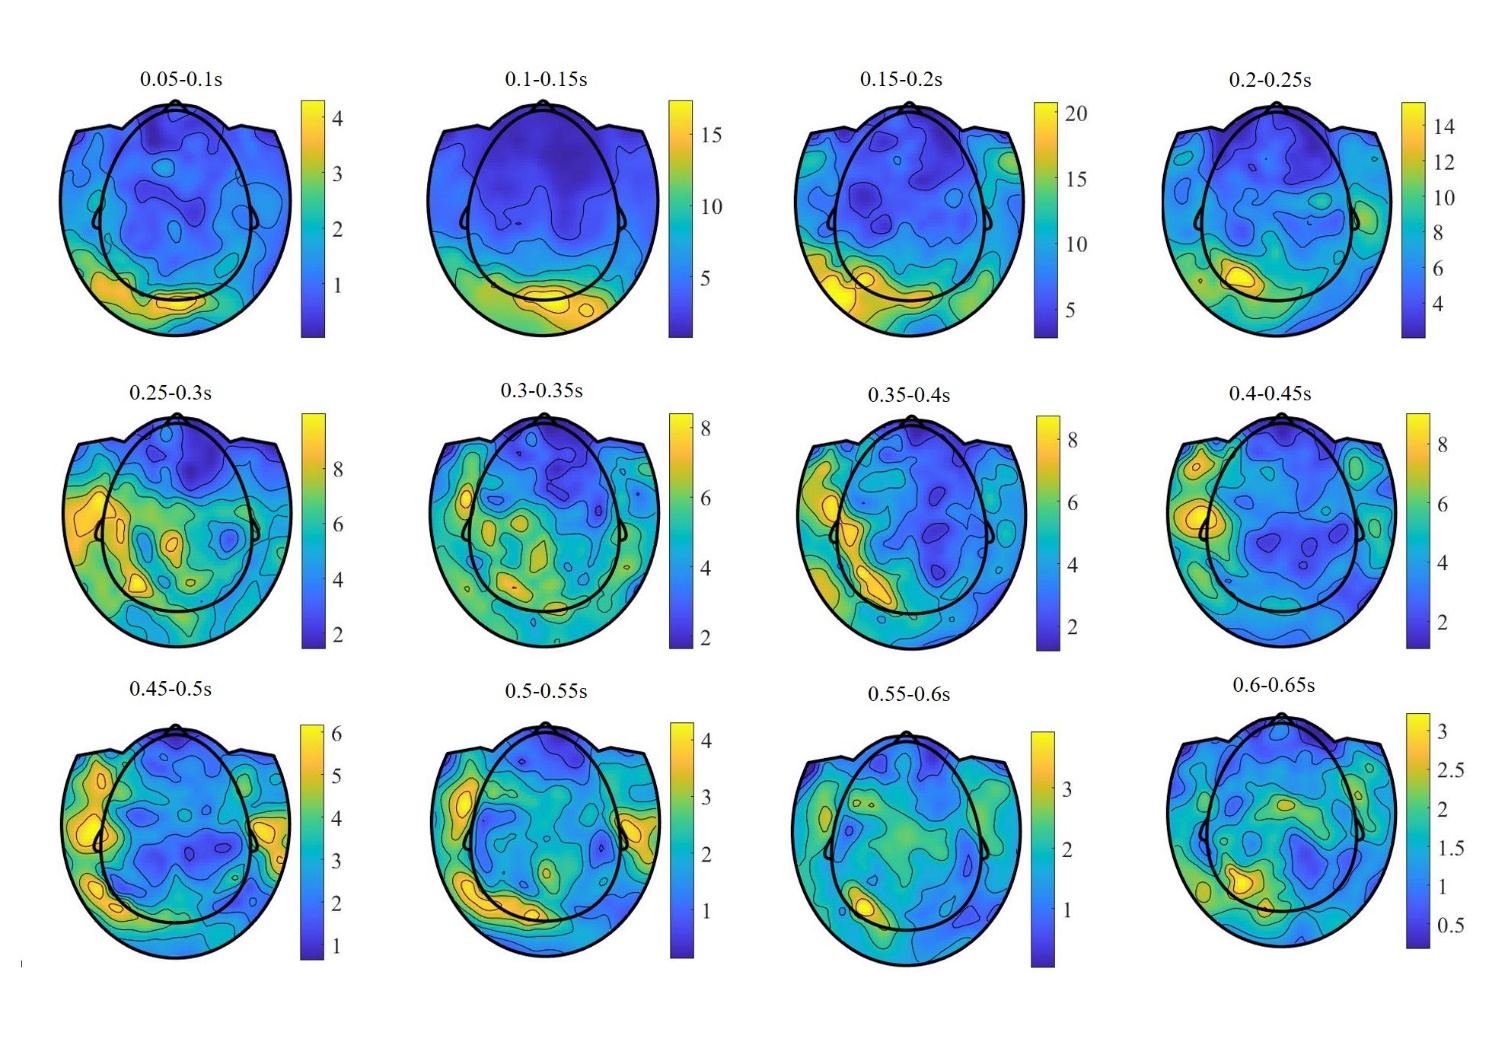


**Supplementary Figure 1.**. Mean planar field distributions in sensor space in controls between 50 and 650ms after stimulus onset in steps of 50ms.


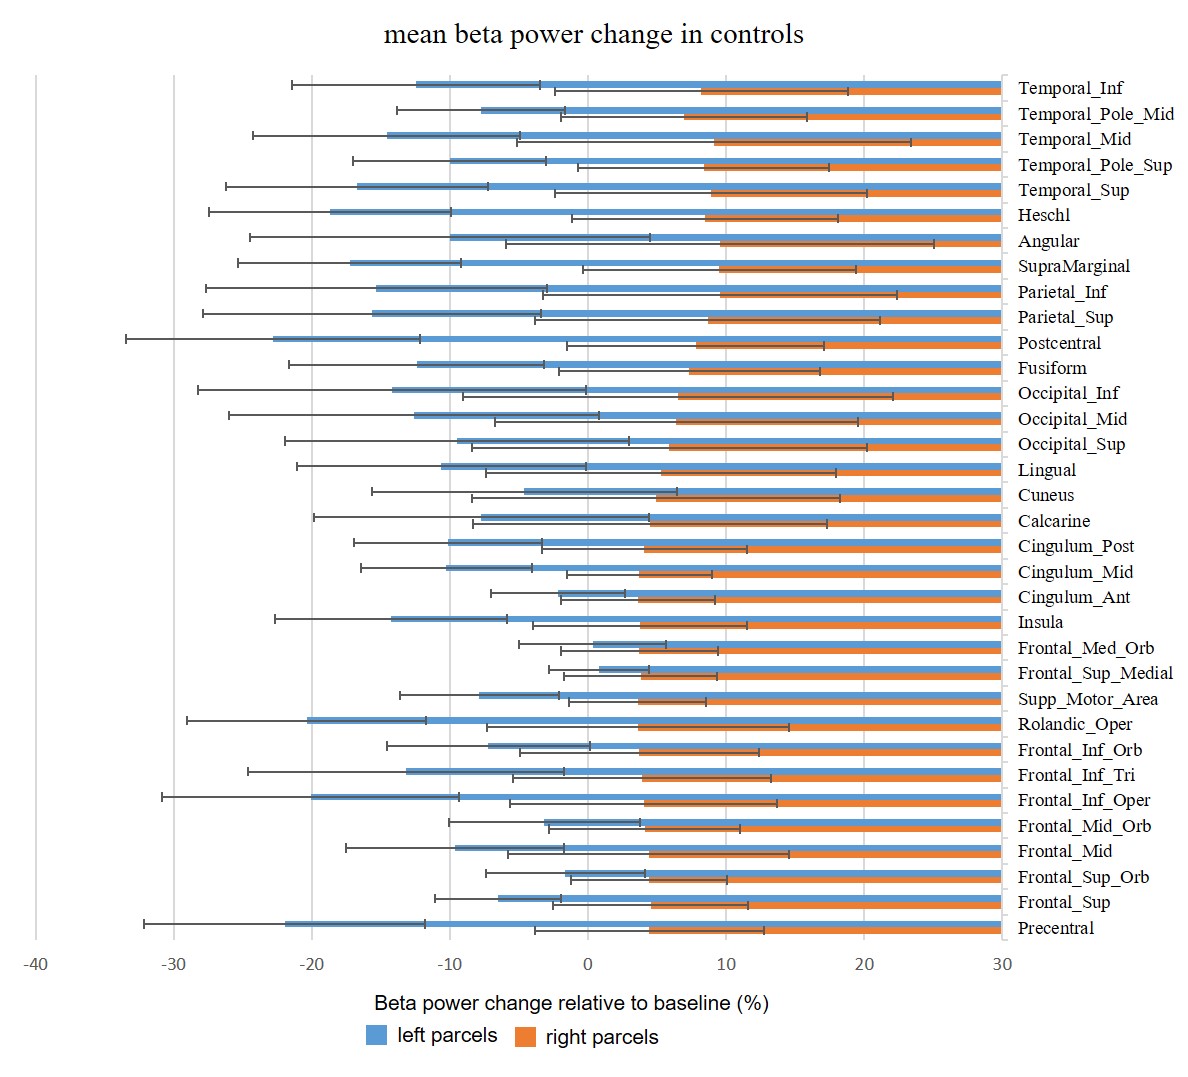


Supplementary Figure . Mean beta power change relative to baseline in controls in left and right anatomical parcels.


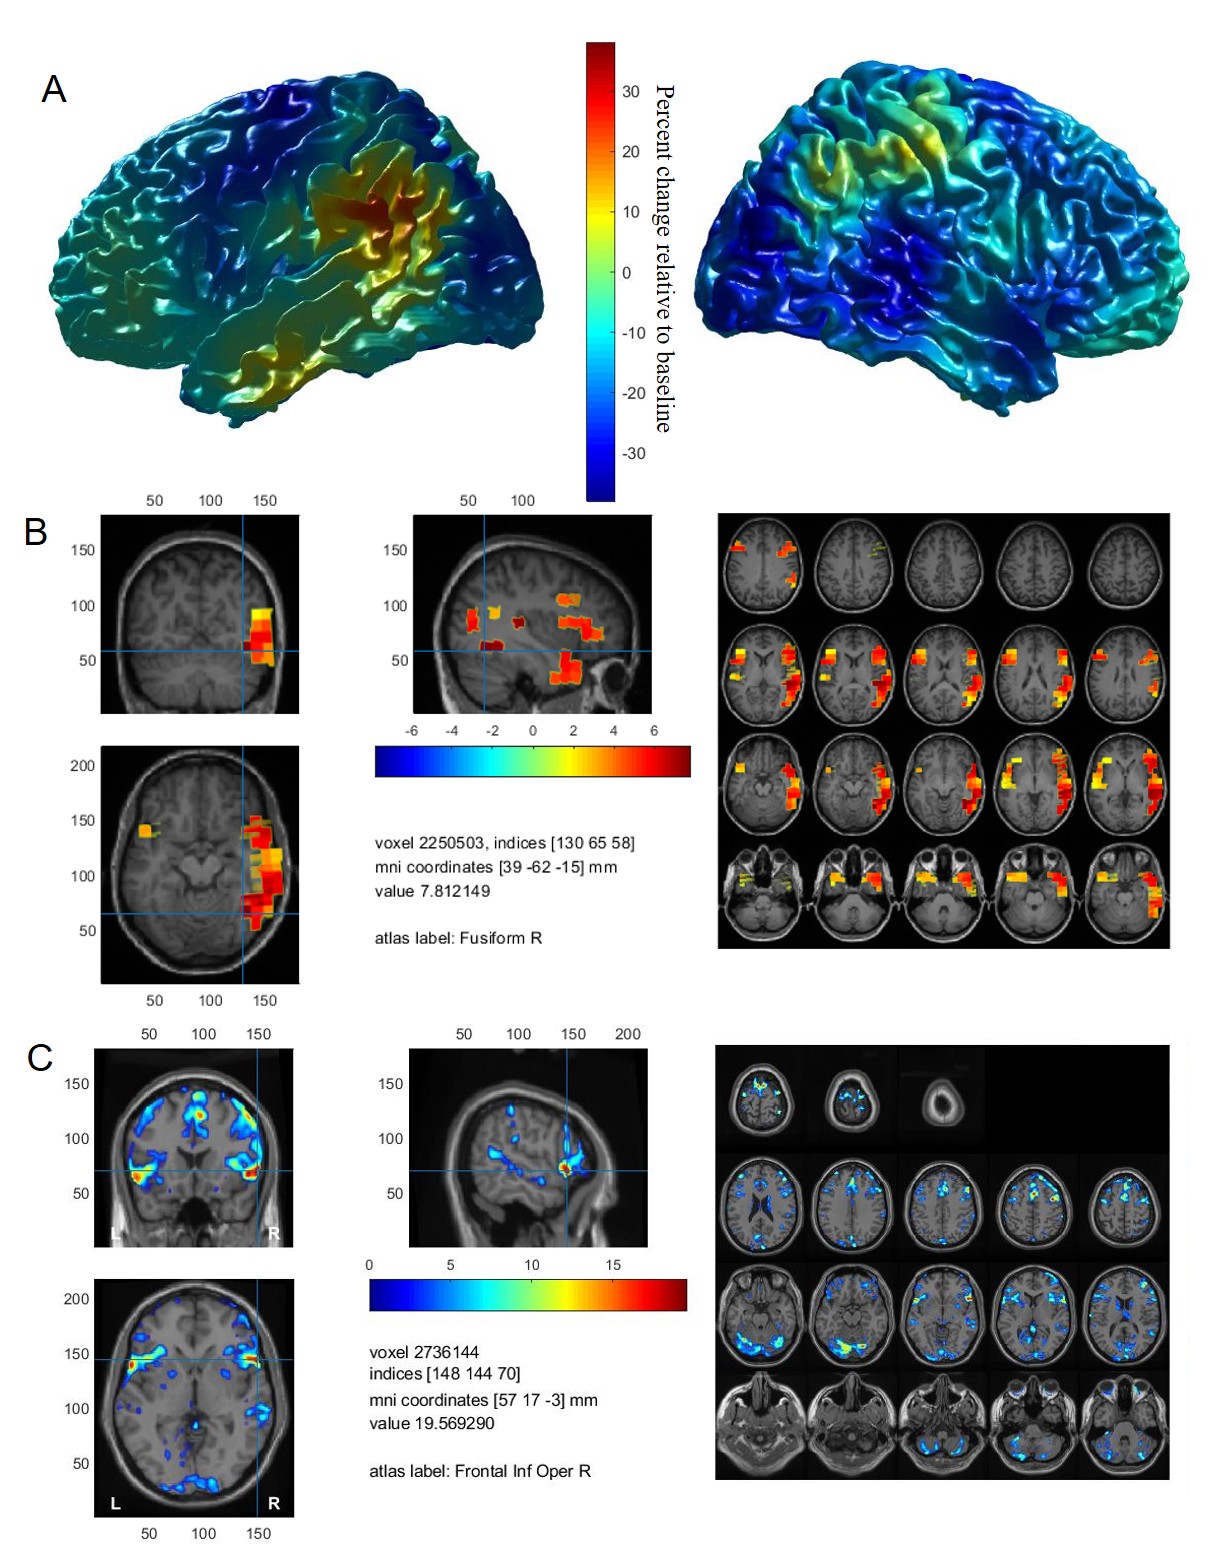


Supplementary Figure . Activation maps in patient 1 with right language dominance in Wada test. A. MEG localization of event related beta modulation between 0.3-1 sec after stimulus onset. Percent change relative to baseline (-0.7-0 sec). B. MEG result of cluster-based permutation testing which was restricted to the regions of interest. The peak t-value is situated within the right temporal lobe. C. fMRI statistical t-map thresholded at p<0.001, uncorrected with a cluster size of 10 voxels. Statistics were not restricted to ROIs. The peak t-value is situated within the pars opercularis of the right IFG.
